# Supplementary material for: Cutaneous Biodistribution: A High-Resolution Methodology to Assess Bioequivalence in Topical Skin Delivery
Source: MDPI journal article supplement (doi:10.3390/pharmaceutics11090484), 2019-09-18
Supplement: s1 [file s1]

# Supplementary Materials: Cutaneous Biodistribution: A High-Resolution Methodology to Assess Bioequivalence in Topical Skin Delivery

Julie Quartier, Ninon Capony, Maria Lapteva and Yogeshvar N. Kalia

## Validation of the UHPLC-MS/MS Method

### *Specificity in Skin Matrix*

Figure S1 shows the MRM trace of (a) ECZ standard alone, (b) MCZ standard alone and (c) a mixture of both compounds.

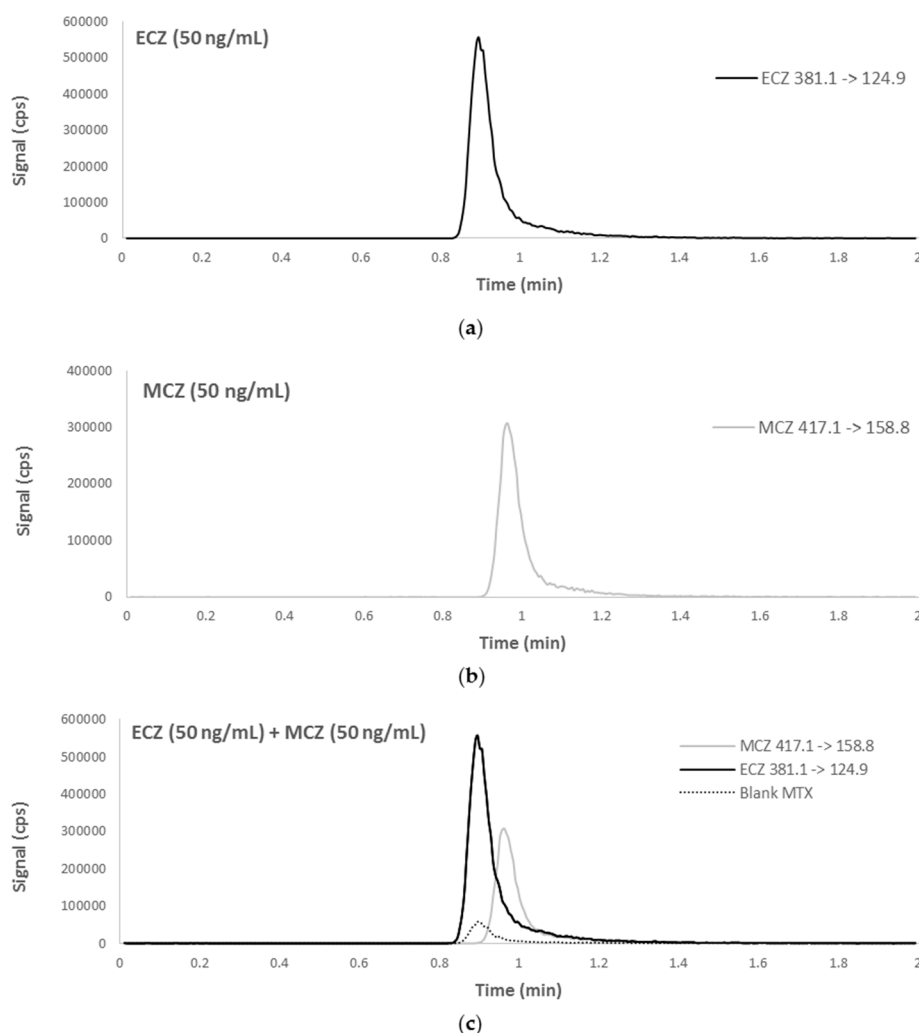

**Figure S1.** Respective MRM traces of (a) ECZ standard alone (b) MCZ standard alone and (c) mixture of both compounds.

Figure S2 presents the chromatogram obtained for an ECZ standard at a concentration of 2 ng/mL, a blank skin extraction sample and a blank permeation sample. No ECZ was found in the permeation sample or in the skin sample. The method was considered as specific for ECZ quantification in skin samples.

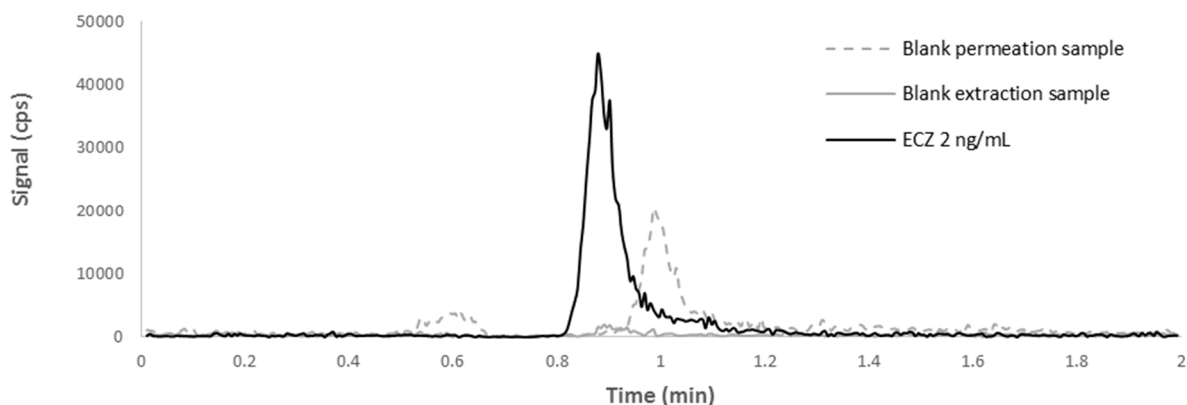

**Figure S2.** MRM monitoring for ECZ in skin sample (381.1 → 124.9 transition) chromatogram of ECZ standard (2 ng/mL), blank extraction sample and blank permeation sample.

### Linearity

Calibration curves were constructed by plotting the ratio of ECZ and MCZ peak area against the ratio of ECZ and MCZ nominal concentration. A good linear fit was found in the concentration range of 1–100 ng/mL. Correlation coefficients for all calibration curves were found to be superior to 0.99.

### Limit of detection and limit of quantification

The lowest concentration of ECZ detected (LOD) and lowest limit of ECZ quantified (LOQ) were found to be 0.7 ng/mL and 2.0 ng/mL, respectively.

### Precision and accuracy

Intra- and inter-day precision and accuracy was assessed using 2, 5, 10, 20, 50, 100 ng/mL ECZ solutions in acetonitrile/water (80/20) skin extract. Table S1 shows a summary of intra-day accuracy and precision and Table S2 shows a summary of inter-day accuracy and precision for the method.

**Table 1.** Intra-day precision and accuracy for quantification of ECZ in skin sample (values are given as mean ± SD).

| [ECZ]<br>Theo<br>(ng/mL) | Intra-Day 1           |            |                 | Intra-Day 2           |            |                 | Intra-Day 3           |            |                 |
|--------------------------|-----------------------|------------|-----------------|-----------------------|------------|-----------------|-----------------------|------------|-----------------|
|                          | [ECZ] Meas<br>(ng/mL) | RSD<br>(%) | Recovery<br>(%) | [ECZ] Meas<br>(ng/mL) | RSD<br>(%) | Recovery<br>(%) | [ECZ] Meas<br>(ng/mL) | RSD<br>(%) | Recovery<br>(%) |
| 2                        | 2.4 ± 0.3             | 11.2       | 119.6           | 2.1 ± 0.0             | 1.2        | 107.1           | 2.1 ± 0.1             | 5.1        | 105.5           |
| 5                        | 5.5 ± 0.2             | 3.6        | 111.0           | 5.5 ± 0.3             | 4.7        | 110.7           | 5.6 ± 0.1             | 2.0        | 111.6           |
| 10                       | 10.8 ± 0.3            | 2.5        | 108.1           | 11.4 ± 0.3            | 2.9        | 114.2           | 10.9 ± 0.0            | 0.2        | 109.5           |
| 20                       | 21.5 ± 0.2            | 2.5        | 107.6           | 21.2 ± 0.1            | 0.4        | 106.1           | 20.8 ± 0.3            | 1.6        | 103.9           |
| 50                       | 53.5 ± 0.6            | 1.1        | 107.0           | 53.9 ± 0.8            | 1.5        | 107.9           | 51.5 ± 1.0            | 2.0        | 103.0           |
| 100                      | 109.5 ± 0.4           | 0.4        | 109.5           | 107.3 ± 2.0           | 1.9        | 107.3           | 102.8 ± 1.4           | 1.4        | 102.8           |

**Table 2.** Inter-day precision and accuracy for quantification of ECZ in skin sample (values are given as mean ± SD).

| [ECZ]<br>Theo<br>(ng/mL) | Intra-Day 1           |            |                 | Intra-Day 2           |            |                 | Intra-Day 3           |            |                 |
|--------------------------|-----------------------|------------|-----------------|-----------------------|------------|-----------------|-----------------------|------------|-----------------|
|                          | [ECZ] Meas<br>(ng/mL) | RSD<br>(%) | Recovery<br>(%) | [ECZ] Meas<br>(ng/mL) | RSD<br>(%) | Recovery<br>(%) | [ECZ] Meas<br>(ng/mL) | RSD<br>(%) | Recovery<br>(%) |
| 2                        | 2.1 ± 0.0             | 2.0        | 103.9           | 2.2 ± 0.2             | 10.6       | 112.0           | 2.3 ± 0.2             | 9.6        | 116.3           |
| 5                        | 5.4 ± 0.1             | 2.0        | 104.1           | 5.6 ± 0.1             | 1.4        | 107.6           | 5.7 ± 0.1             | 1.0        | 109.9           |
| 10                       | 10.8 ± 0.3            | 2.5        | 108.3           | 11.1 ± 0.4            | 3.4        | 111.0           | 11.2 ± 0.4            | 3.4        | 112.4           |
| 20                       | 21.1 ± 0.7            | 3.3        | 105.6           | 21.2 ± 0.3            | 1.3        | 105.8           | 21.2 ± 0.2            | 0.7        | 106.2           |
| 50                       | 52.6 ± 2.1            | 4.1        | 105.3           | 52.8 ± 0.9            | 1.6        | 105.6           | 53.5 ± 1.0            | 1.9        | 107.0           |
| 100                      | 106.3 ± 4.4           | 4.1        | 106.3           | 107.0 ± 3.4           | 3.2        | 107.0           | 106.2 ± 3.1           | 2.9        | 106.2           |

The mean recovery observed for intra-day measurement on day 1 was from 107.0 to 119.6% (RSD 0.4–11.2%), on day 2 it was from 106.1 to 114.2% (RSD 0.4–4.7%) and on day 3 from 102.8 to 111.6% (RSD 0.2–5.1%). The mean recovery observed for inter-day 1 analysis was between 103.9 and 108.3% (RSD 2.0–4.1%), for inter-day 2 it was between 105.6 and 112.0% (RSD 1.3–10.6%), for inter-day 3 it was between 106.2 and 116.3% (RSD 0.7–9.6%).

The method was considered as accurate and precise as all measured values were within the acceptance limits of the ICH guidelines Validation of Analytical Procedure Q2(R1) (2005).

## Abbreviations

Table S3 shows the abbreviations used in the article.

**Table 3.** Table of abbreviations.

|                  |                                                        |
|------------------|--------------------------------------------------------|
| AUC              | area under the curve                                   |
| BE               | bioequivalence                                         |
| CI               | confidence interval                                    |
| C <sub>max</sub> | peak drug concentration in the blood                   |
| ECZ              | econazole                                              |
| EMA              | European Medicines Agency                              |
| ICH              | International Council for Harmonisation                |
| IVPT             | <i>in vitro</i> permeation test                        |
| IVRT             | <i>in vitro</i> release test                           |
| LOD              | limit of detection                                     |
| LOQ              | limit of quantification                                |
| MCZ              | miconazole                                             |
| MRM              | multiple reaction monitoring                           |
| MS               | mass spectrometry                                      |
| OECD             | Organisation for Economic Co-operation and Development |
| RMP              | reference medicinal product                            |
| RSD              | relative standard deviation                            |
| SC               | <i>stratum corneum</i>                                 |
| T <sub>max</sub> | time at C <sub>max</sub>                               |
| UHPLC            | ultra-high pressure liquid chromatography              |
